# Supplementary material for: Transition metal sulfide-laminated copper wire for flexible hybrid supercapacitor
Source: Royal Society of Chemistry journal article supplement (doi:10.1039/d0nj01955k), 2020-01-01
Supplement: d0nj01955k1.pdf [file d0nj01955k1.pdf]

## Electronic Supplementary Information

### Transition metal sulfides laminated copper wire for flexible hybrid supercapacitor

Swati J. Patil<sup>a, b</sup>, R. B. Pujari<sup>a</sup>, Tian-Feng Hou<sup>a</sup>, Dong-Weon Lee\*<sup>a, c</sup>

<sup>a</sup>MEMS and Nanotechnology Laboratory, Graduate School of Mechanical Engineering,

Chonnam National University, Gwangju 61186, Republic of Korea

<sup>b</sup>Department of Energy and Materials Engineering, Dongguk University-Seoul,

Seoul, 04620, Republic of Korea

<sup>c</sup>Center for Next-Generation Sensor Research and Development, Chonnam National University,

Gwangju 61186, Republic of Korea

\*Corresponding author: Prof. Dong-Weon Lee, E\_mail: [mems@jun.ac.kr](mailto:mems@jun.ac.kr)

### Experimental details:

The chemicals used for the electrodeposition of the nanostructure material were received from Sigma Aldrich reagent quality and used without further purifications. Firstly, Cu-wire was cleaned with distilled water (DW), ethanol, and acetone and then used for deposition. Electrodeposition was conducted in potentiostatic mode through a three-electrode system with a platinum plate, Ag/AgCl and Cu-wire as a counter, reference and working electrodes, respectively at low temperature (50 °C). **Schema 1** shows the schematic representation for the stepwise formation of NiCo<sub>2</sub>S<sub>4</sub> nanoflakes and ZnCo<sub>2</sub>S<sub>4</sub> nanosheets on a Cu-wire for flexible hybrid supercapacitors. In the first step, a single layer of CoS was formed on Cu-wire. In which, working electrolyte solution was prepared by mixing 10 mM Co(NO)<sub>3</sub>.6H<sub>2</sub>O, and 0.10 M thiourea in distilled water (40 mL) and experiment conducted at -1.2 V/SCE for 60 s deposition time, resulting in the formation of the Cu@CoS. Further, NiCo<sub>2</sub>S<sub>4</sub> formed on a Cu@CoS by following potentiostatic mode of electrodeposition at -1.2 V/SCE for 300 s with electrolyte solution contains, 5 mM Ni(NO)<sub>3</sub>.6H<sub>2</sub>O, 10 mM Co(NO)<sub>3</sub>.6H<sub>2</sub>O, and 0.10 M thiourea mixed in 50 ml DW. The resulting Cu@CoS/NiCo<sub>2</sub>S<sub>4</sub> thin film rinsed in DI water and dried at 60 °C for 4 h. For the second electrode preparation, electro-deposition was conducted for ZnCo<sub>2</sub>S<sub>4</sub>. In this case, the experiment was performed the same with NiCo<sub>2</sub>S<sub>4</sub>, only replacing Ni (NO)<sub>3</sub>.6H<sub>2</sub>O instead of Zn(NO)<sub>3</sub>.6H<sub>2</sub>O in an electrolyte solution. The Cu@ZnCo<sub>2</sub>S<sub>4</sub> thin film further formed on Cu-wire at the applied cathodic potential of -1.5 V/SCE for 600s then samples rinsed in DI water and dried 4 h. Finally, Cu@CoS/NiCo<sub>2</sub>S<sub>4</sub> and Cu@ZnCo<sub>2</sub>S<sub>4</sub> thin films used for further physico-electrochemical characterizations.

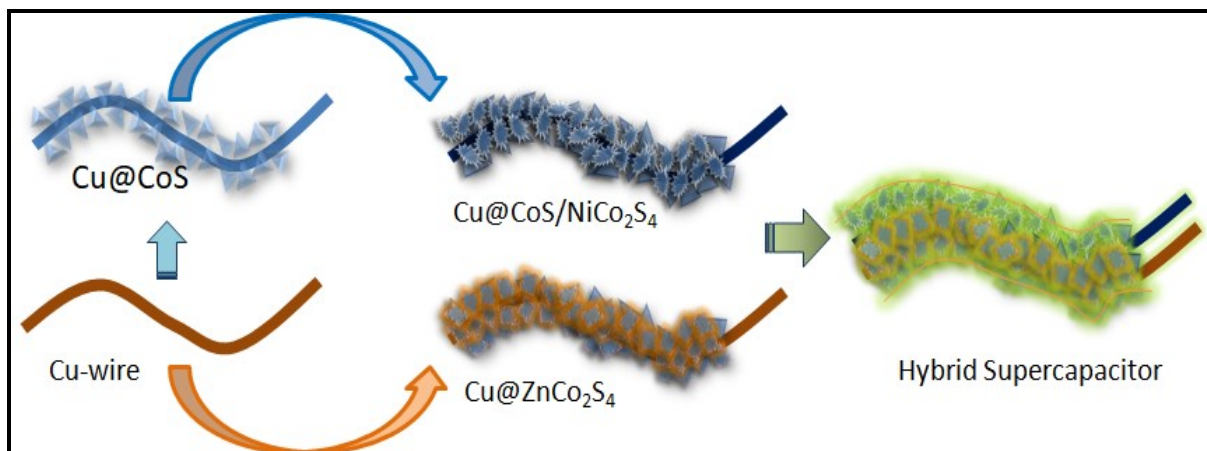

**Schema 1** Schematic illustration for the formation of a flexible hybrid supercapacitor on Cu-wire.

Electrochemical charge storage and impedance evaluations of electrodeposited material were evaluated using cyclic voltammetry (CV), and galvanostatic charge-discharge (GCD) and electrochemical impedance spectroscopy (EIS) using an IVIUM Tech potentiostat with the help of the three-electrode and a two-electrode system. For three-electrode system, electrochemical performances of the separate electrode were performed in 1M KOH electrolyte. In the case of a two-electrode system, the flexible wire-type hybrid supercapacitor was fabricated using Cu@CoS/NiCo<sub>2</sub>S<sub>4</sub> and Cu@ZnCo<sub>2</sub>S<sub>4</sub> electrodes assembled in polymeric gel electrolyte (PVA-KOH). The fabricated supercapacitor cell noted as NiCo<sub>2</sub>S<sub>4</sub>//ZnCo<sub>2</sub>S<sub>4</sub> FWHSCs.

### Formulas:

The specific capacity of the electrode was calculated from the cyclic voltammetry curve using formula (1) in a three-electrode configuration. From the charge/discharge study, the specific capacity, specific capacitance, power, and energy density of the electrode were calculated using the following formulae (2)-(5).

$$1. \text{ Specific capacity} = \frac{\int i(v)dv}{m \times v \times 3600}$$

2.  $Specific\ capacity = \frac{i \times \Delta t \times A}{3600 \times m}$
3.  $Specific\ capacitance = C_{cd} = \frac{specific\ capacity \times 3600}{\Delta V(V)}$
4.  $P = \frac{E \times 3600}{\Delta t}$
5.  $E = \frac{0.5 \times C_{cd} \times (\Delta V)^2}{3600}$

Where,  $\int i(v)dv$  (mA.V): average integrated area under the CV curves,  $v$  ( $mV\ s^{-1}$ ): scan rate, and  $m$  (g): loading mass of the electrode material.  $I$  ( $mA\ cm^2$ ): current density,  $\Delta t$  (s): discharge time,  $\Delta V$  (V): potential window and  $A$  ( $cm^2$ ): active area of the electrode.  $P$  ( $W\ kg^{-1}$ ): power density,  $E$  ( $Wh\ kg^{-1}$ ): energy density,

### XRD studies

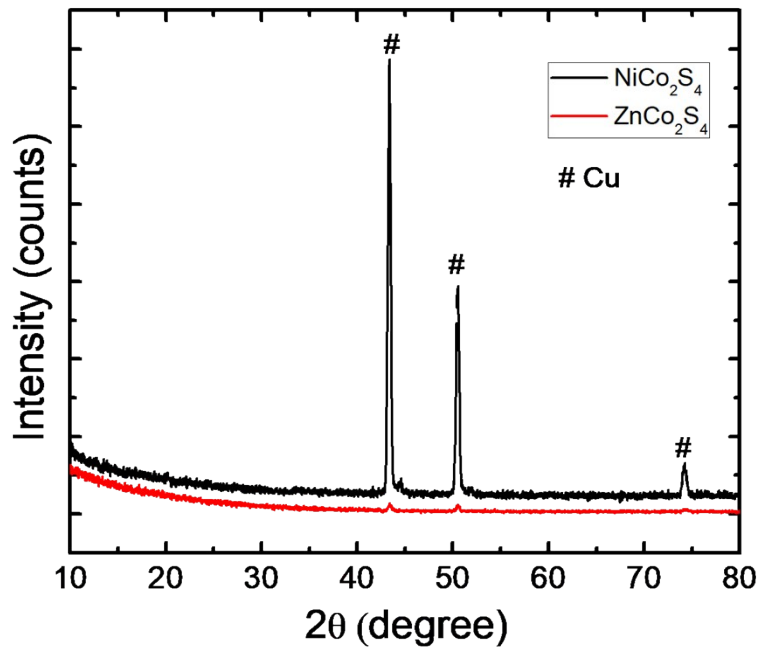

**Figure S1** The XRD patterns of the electrodeposited materials.

### XPS studies

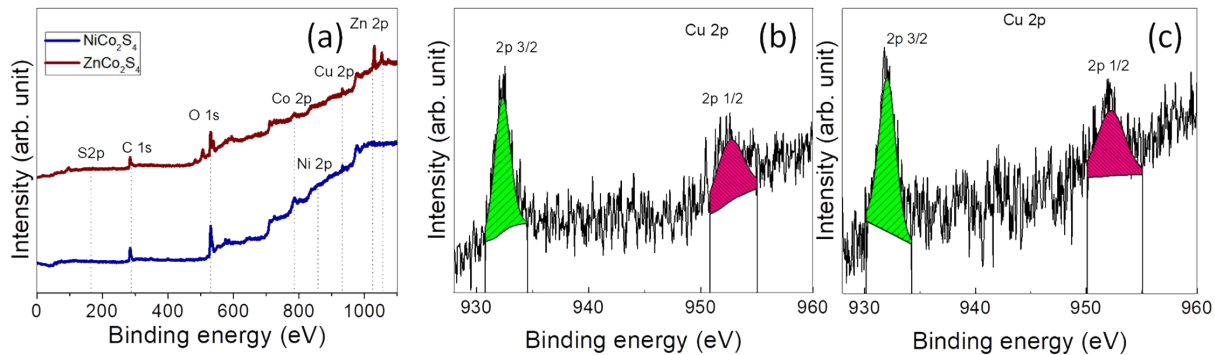

**Figure S2 (a)** The wide XPS scan spectra of CoS/NiCo<sub>2</sub>S<sub>4</sub> and ZnCo<sub>2</sub>S<sub>4</sub> materials. The XPS narrow scan spectra of Cu 2p in **(b)** Cu@CoS/NiCo<sub>2</sub>S<sub>4</sub> and **(c)** Cu@ZnCo<sub>2</sub>S<sub>4</sub> materials.

### Electrochemical results

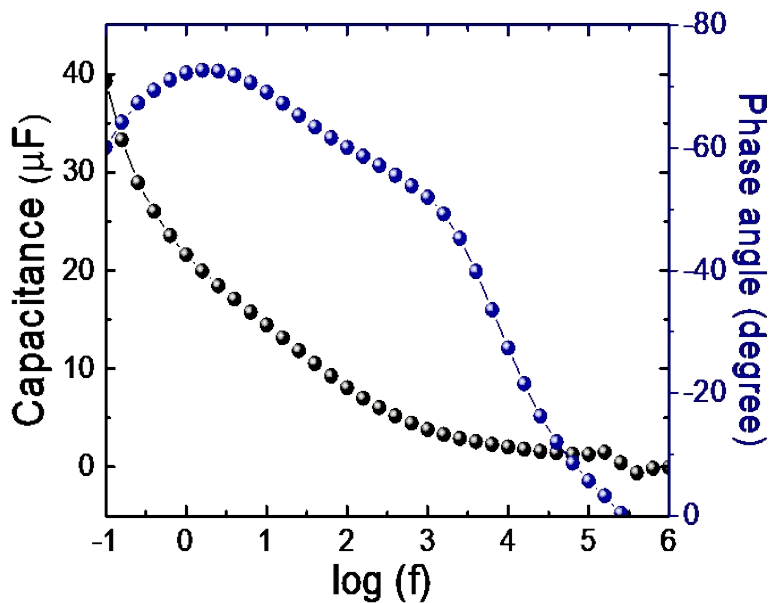

**Fig S3** Bode plot of the NiCo<sub>2</sub>S<sub>4</sub>//ZnCo<sub>2</sub>S<sub>4</sub> FWHSCs.

**Table S1** The atomic percentages of the elements obtained from the EDX spectra for the Cu@CoS, Cu@NiCo<sub>2</sub>S<sub>4</sub>, Cu@CoS/NiCo<sub>2</sub>S<sub>4</sub>, and Cu@ZnCo<sub>2</sub>S<sub>4</sub> materials.

| Cu@CoS         |            | Cu@NiCo <sub>2</sub> S <sub>4</sub> |            | Cu@CoS/NiCo <sub>2</sub> S <sub>4</sub> |            | Cu@ZnCo <sub>2</sub> S <sub>4</sub> |            |
|----------------|------------|-------------------------------------|------------|-----------------------------------------|------------|-------------------------------------|------------|
| <i>Element</i> | <i>At%</i> | <i>Element</i>                      | <i>At%</i> | <i>Element</i>                          | <i>At%</i> | <i>Element</i>                      | <i>At%</i> |
| <b>OK</b>      | 50.18      | <b>OK</b>                           | 14.48      | <b>OK</b>                               | 13.69      | <b>OK</b>                           | 12.08      |
| <b>SK</b>      | 3.65       | <b>SK</b>                           | 39.47      | <b>SK</b>                               | 42.69      | <b>SK</b>                           | 39.53      |
| <b>CoK</b>     | 22.13      | <b>CoK</b>                          | 21.33      | <b>CoK</b>                              | 19.84      | <b>CoK</b>                          | 20.46      |
| <b>NiK</b>     | 0.00       | <b>NiK</b>                          | 09.34      | <b>NiK</b>                              | 8.88       | <b>ZnK</b>                          | 12.84      |
| <b>CuK</b>     | 24.04      | <b>CuK</b>                          | 15.38      | <b>CuK</b>                              | 14.9       | <b>CuK</b>                          | 15.09      |

**Table S2** The table shows the electrochemical performance of the fabricated wire-type NiCo<sub>2</sub>S<sub>4</sub>//ZnCo<sub>2</sub>S<sub>4</sub> HSCs compared with the previous literature report.

| <b>Electrode material</b>                                                | <b>Capacitance</b>         | <b>Power density</b>      | <b>Energy density</b>      | <b>Ref.</b>         |
|--------------------------------------------------------------------------|----------------------------|---------------------------|----------------------------|---------------------|
| 3D-NiMoO <sub>4</sub> /Ni@CW//rGO/CF                                     | 0.504 F cm <sup>-2</sup>   | 4050 μW cm <sup>-2</sup>  | 0.202 mWh cm <sup>-2</sup> | [1]                 |
| CuO@CoFe-LDH                                                             | 468.75 mF cm <sup>-2</sup> | 45720 μW cm <sup>-2</sup> | 93.75 μWh cm <sup>-2</sup> | [2]                 |
| pErGO@Cuf/Cu wire                                                        | 283.5 mF cm <sup>-2</sup>  | 7.6 mW cm <sup>-2</sup>   | 39.3 μWh cm <sup>-2</sup>  | [3]                 |
| NiVS/NiCuP/CW/rGO/CF                                                     | 13.4 F cm <sup>-2</sup>    | 4.3 mW cm <sup>-2</sup>   | 295 μWh cm <sup>-2</sup>   | [4]                 |
| Cu@Ni@NiCoS NFs                                                          | -                          | 11.15 μW cm <sup>-2</sup> | 0.48 μWh cm <sup>-2</sup>  | [5]                 |
| CoNi <sub>2</sub> S <sub>4</sub> /E-NZP film @CW//rGO/CF                 | 8.9 F cm <sup>-2</sup>     | 9280 μW cm <sup>-2</sup>  | 108.4 μWh cm <sup>-2</sup> | [6]                 |
| NiCo <sub>2</sub> S <sub>4</sub> //ZnCo <sub>2</sub> S <sub>4</sub> HSCs | 4.8 mF cm <sup>-2</sup>    | 1125 mW cm <sup>-2</sup>  | 1.5 mWh cm <sup>-2</sup>   | <b>Present work</b> |

#### References:

[1] L. Naderi and S. Shahrokhian, J Colloid and Inter. Sci. 542 (2019) 325–338.

- [2] Z. Li, M. Shao, L. Zhou, R. Zhang, C. Zhang, J. Han, M. Wei, D. G. Evans and X. Duan, Nano Energy 20 (2016) 294-304.
- [3] T. Purkait, G. Singh, D. Kumar, M. Singh and R. S. Dey, Sci. Rep. 8 (2018) 640-653.
- [4] L. Naderi and S. Shahrokhian, Chem. Eng. J. 392 (2020) 124880.
- [5] B. S. Soram, I. S. Thangjam, J. Y. Dai, T. Kshetria, N. H. Kim, J. H. Lee, Chem. Eng. J. 395 (2020) 125019.
- [6] S. Shahrokhian and S. Shahrokhian, J. Phys. Chem. C 123 (2019) 21353–21366.
